# Supplementary material for: Characterization of the endotheliopathy, innate-immune activation and hemostatic imbalance underlying CAR-T cell toxicities: laboratory tools for an early and differential diagnosis
Source: HighWire-hosted journal article supplement (doi:10.1136/jitc-2022-006365), 2023-04-01
Supplement: jitc-2022-006365supp004_data_supplement.pdf [file jitc-2022-006365supp004_data_supplement.pdf]

**Supplementary Table 1. Frequencies of hematological diseases treated with the different constructs.**

| <b>Total n=62</b>              |                                                               | <b>N (%)</b> |
|--------------------------------|---------------------------------------------------------------|--------------|
| Varnimcabtagene autoleucl for: |                                                               |              |
|                                | Acute lymphoblastic leukemia                                  | 22 (35.5)    |
|                                | Diffuse large B cell lymphoma                                 | 3 (4.8)      |
|                                | Indolent B cell lymphoproliferative disorders                 | 3 (4.8)      |
|                                | Hodgkin Lymphoma transformed to Diffuse Large B cell lymphoma | 1 (1.6)      |
| Axicabtagene Ciloleucl for:    |                                                               |              |
|                                | Diffuse large B cell lymphoma                                 | 11 (17.7)    |
|                                | Indolent B cell lymphoproliferative disorders                 | 1 (1.6)      |
|                                | Mantle cell lymphoma                                          | 2 (3.2)      |
| Lisocabtagene maraleucl for:   |                                                               |              |
|                                | Diffuse large B cell lymphoma                                 | 3 (4.8)      |
| ARI0002h for:                  |                                                               |              |
|                                | Multiple myeloma                                              | 15 (24.2)    |
|                                | Plasma cell leukemia                                          | 1 (1.6)      |
