# Supplementary figures and images for: Characterization of the endotheliopathy, innate-immune activation and hemostatic imbalance underlying CAR-T cell toxicities: laboratory tools for an early and differential diagnosis
Source: HighWire-hosted journal article supplement (doi:10.1136/jitc-2022-006365), 2023-04-01

Sup. Figure 1

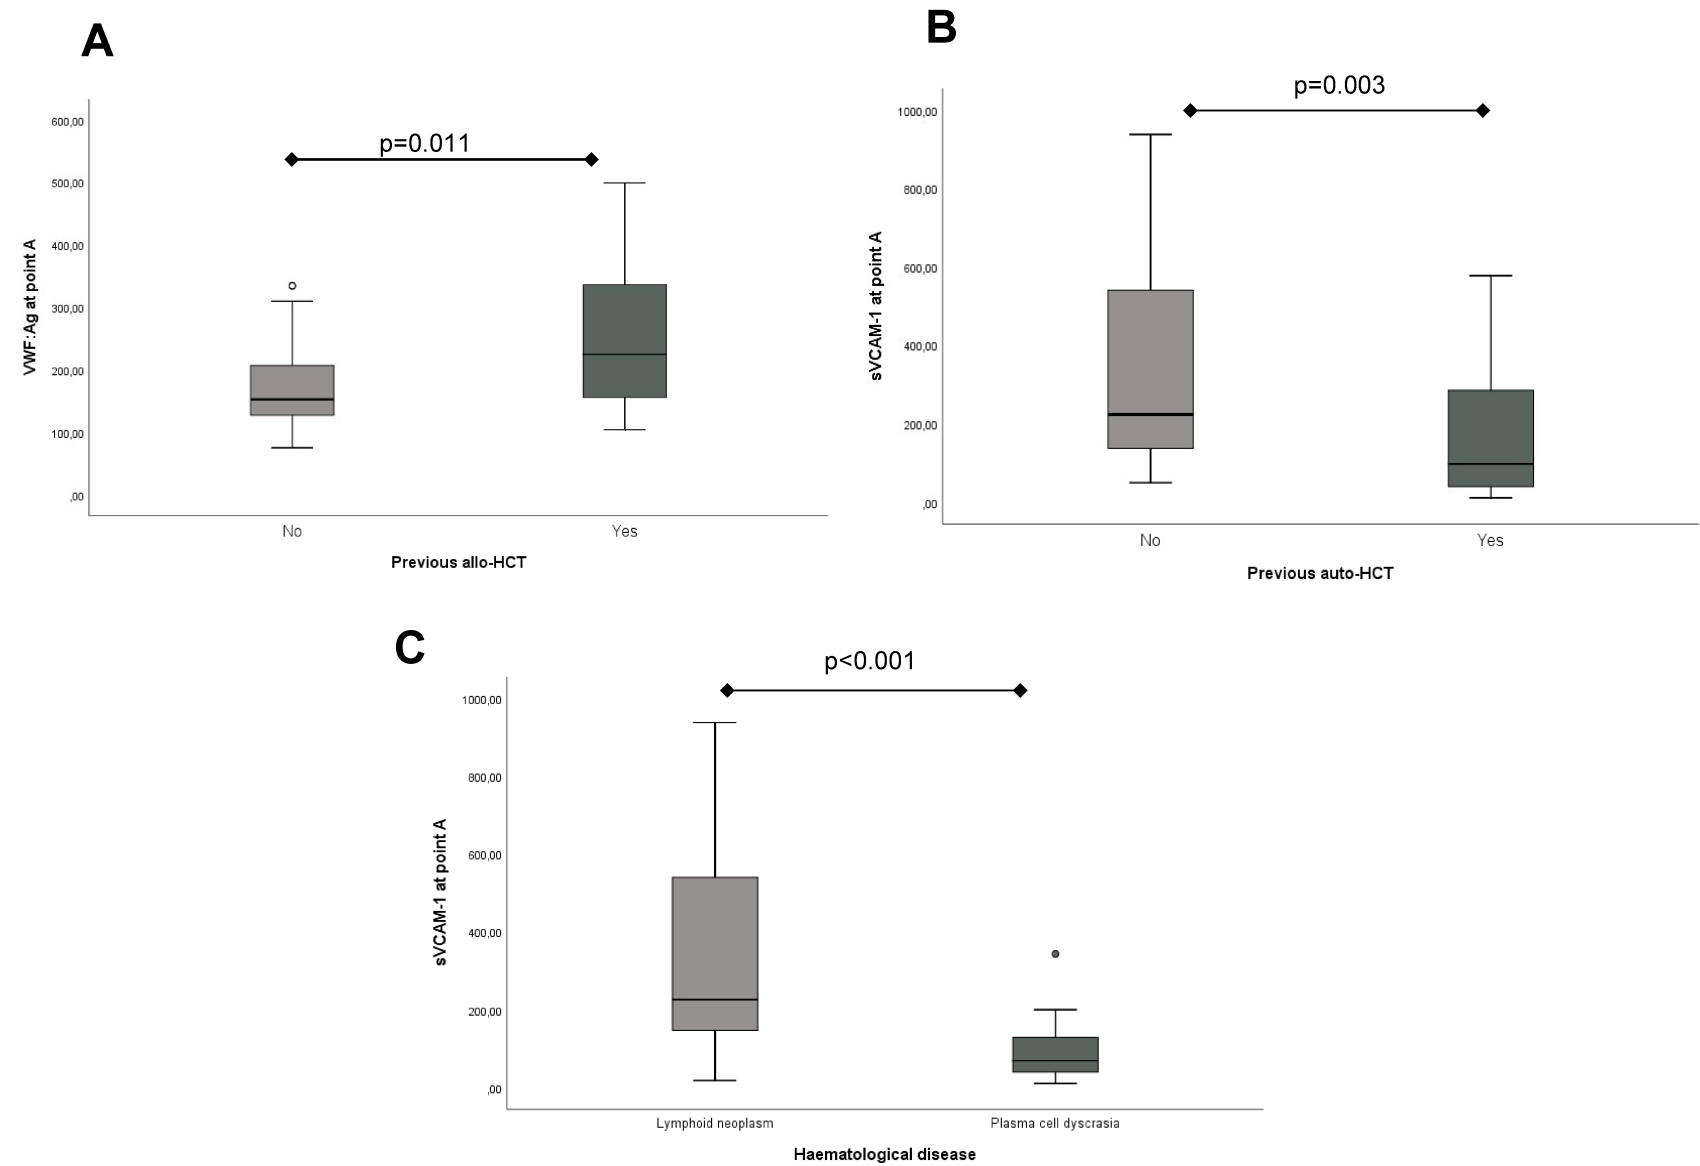

Supplement: jitc-2022-006365supp001_data_supplement.pdf [file jitc-2022-006365supp001_data_supplement.pdf]
